# Supplementary material
Source: MDPI journal article supplement (https://www.mdpi.com/2227-9717/11/9/2714)
Supplement: s1 [file s1]

**Table S1** Descriptive information of the spectral curves

| <b>Spectral type</b> | <b>Transformation</b> | <b>Spectral range</b> | <b>Nodes</b> | <b>Value range</b> | <b>Areas of change concentration</b> |
|----------------------|-----------------------|-----------------------|--------------|--------------------|--------------------------------------|
| vis-NIR              | RS                    | 350-2500 nm           | 768          | 2.96-56.48         | 400-1000 nm                          |
|                      | CT                    |                       | 768          | -29.15-19.82       | 400-1400 nm                          |
|                      | SNV                   |                       | 768          | -2.48-1.56         | 450-1400 nm, 2100-2500 nm            |
|                      | MSC                   |                       | 768          | -27.35-16.63       | 450-1400 nm, 2100-2500 nm            |
|                      | D1                    |                       | 767          | -2.06-0.56         | 500-1000 nm                          |
|                      | D2                    |                       | 766          | -0.60-0.33         | 1000-1500 nm                         |
|                      | DT                    |                       | 768          | -17.72-15.58       | 500-1400 nm                          |
|                      | CR                    |                       | 768          | 0.16-1.01          | 400-1000 nm                          |
|                      | CL                    |                       | 768          | 0.57-3.52          | 400-700 nm                           |
| XRF                  | RS                    | 0.39-53.205 keV       | 3522         | -7.27-859.00       | 6-24 keV                             |
|                      | CT                    |                       | 3522         | -19.21-847.08      | 3-24 keV                             |
|                      | SNV                   |                       | 3522         | -0.81-20.33        | 3-24 keV                             |
|                      | MSC                   |                       | 3522         | -24.82-594.95      | 3-24 keV                             |
|                      | D1                    |                       | 3521         | -114.71-117.11     | 5-11 keV                             |
|                      | D2                    |                       | 3520         | -43.95-20.55       | 5-10 keV                             |
|                      | DT                    |                       | 3522         | -27.91-838.89      | 5-21 keV                             |
|                      | CR                    |                       | 3522         | -137.46-340.23     | 5-12 keV                             |
